# Supplementary material for: Fast and accurate nonadiabatic molecular dynamics enabled through variational interpolation of correlated electron wavefunctions
Source: Royal Society of Chemistry journal article supplement (doi:10.1039/d4fd00062e), 2024-01-01
Supplement: d4fd00062e1.zip [file d4fd00062e1.zip]

## Supplementary Videos

### I. SMALLER HYDROGEN CHAINS

Both FCI and eigenvector continuation trajectories are plotted side by side, including their comparison for energies, populations and atomic distances. The trajectory for the 4-atom hydrogen chain is given under `H4/traj_H4_S1.mp4` and for the 8-atom hydrogen chain under `H8/traj_H8_S3_sym.mp4`. The training wavefunctions used for eigenvector continuation and details of the electronic and FSSH calculations are given in the main text.

### II. 28-ATOM HYDROGEN CHAIN DYNAMICS

Some exemplary trajectories for the different configurations of the nonadiabatic 28-atom hydrogen chain dynamics are given in the H28 folder. `H28/traj_idealdimer.gif` shows one the trajectories that was identified to form ideal  $\text{H}_2$  dimers, whereas a trimer formation is demonstrated in `H28/traj_trimer567.gif` between the 5<sup>th</sup>, 6<sup>th</sup> and 7<sup>th</sup> hydrogen atoms. Finally, a rare free hydrogen case is shown in `H28/traj_free12.gif` where  $\text{H}_{10}\text{-H}_{11}$  and  $\text{H}_{13}\text{-H}_{14}$  form dimers leaving the 12<sup>th</sup> hydrogen free.
